# Supplementary material for: Distribution of endocannabinoid system receptors in the equine hoof: dysregulation as a potential therapeutic target for laminitis
Source: Springer Nature journal article supplement (doi:10.1007/s00418-025-02397-y), 2025-07-01
Supplement: MOESM1 [file 418_2025_2397_MOESM1_ESM.docx]

Distribution of endocannabinoid system receptors in the equine hoof: dysregulation as a potential therapeutic target for laminitis

Histochemistry and Cell Biology

Rodrigo Zamith Cunha1,2*, Francesca Gobbo1, Maria Morini1, Augusta Zannoni1, Carlo Mainardi1, Lorenzo D’arpe1, Alessandro Gramenzi2, Roberto Chiocchetti1

1 Department of Veterinary Medical Sciences (UNI EN ISO 9001:2008), University of Bologna, Italy

2 Department of Veterinary Medicine, University of Teramo, Teramo, Italy

* Corresponding author email: rodrigo.zamithcunha@studio.unibo.it


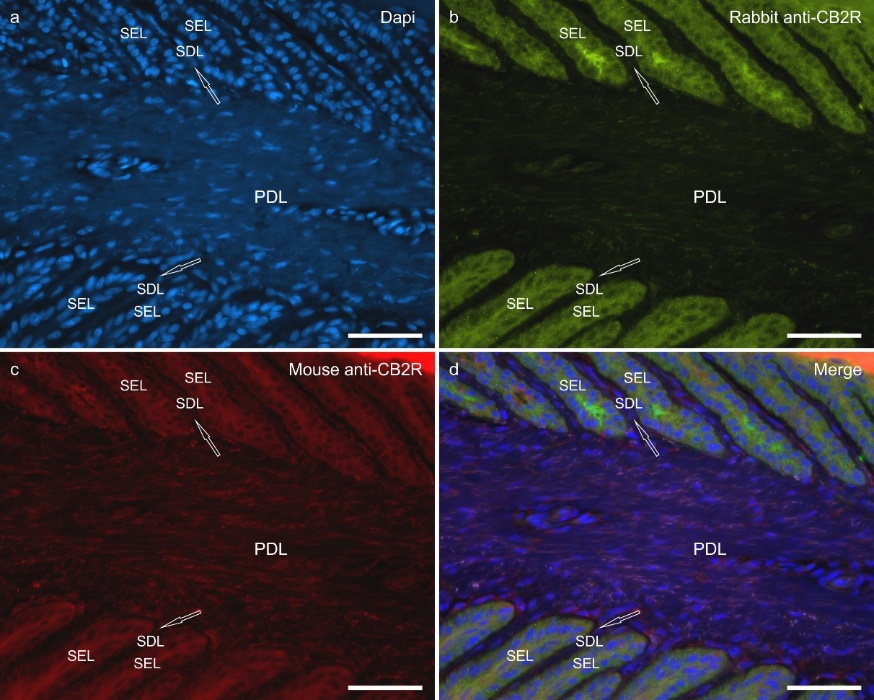


**Supplementary item 1** – Immunolabelling of equine hoof lamellae using two different antibodies directed against cannabinoid receptor type 2 (CB2R). The arrows indicate secondary dermal lamellae (SDL). Abbreviations: PDL, primary dermal lamellae; SEL, secondary epidermal lamellae.
