# Supplementary material for: Distribution of endocannabinoid system receptors in the equine hoof: dysregulation as a potential therapeutic target for laminitis
Source: Springer Nature journal article supplement (doi:10.1007/s00418-025-02397-y), 2025-07-01
Supplement: MOESM3 [file 418_2025_2397_MOESM3_ESM.docx]

Distribution of endocannabinoid system receptors in the equine hoof: dysregulation as a potential therapeutic target for laminitis

Histochemistry and Cell Biology

Rodrigo Zamith Cunha1,2*, Francesca Gobbo1, Maria Morini1, Augusta Zannoni1, Carlo Mainardi1, Lorenzo D’arpe1, Alessandro Gramenzi2, Roberto Chiocchetti1

1 Department of Veterinary Medical Sciences (UNI EN ISO 9001:2008), University of Bologna, Italy

2 Department of Veterinary Medicine, University of Teramo, Teramo, Italy

* Corresponding author email: rodrigo.zamithcunha@studio.unibo.it

**Supplementary item 3** - Statistical Results for Immunoreactivity Comparisons

| Receptor | Comparison | 95% Confidence Interval of Difference | P Value | Significant |
| --- | --- | --- | --- | --- |
| CB1R | Axial HL x Abaxial HL | -1522 to 2545 | 0.4818 | No |
| Axial ALL x Abaxial ALL | -21808 to 6745 | 0.1918 | No |
| Axial CLL x Abaxial CLL | -10446 to 4096 | 0.3264 | No |
| HL vs. ALL | -31796 to -44.78 | 0.0489 | Yes |
| HL vs. CLL | -16004 to 12140 | 0.8169 | No |
| ALL vs. CLL | -83.74 to 28060 | 0.0699 | No |
| HL vs. CLL UP | -17432 to -4337 | 0.0010 | Yes |
| HL vs. CLL DOWN | 4160 to 15850 | 0.0031 | Yes |
| CB2R | Axial HL x Abaxial HL | -2837 to 7851 | 0.2323 | No |
| Axial ALL x Abaxial ALL | -4720 to 17229 | 0.1674 | No |
| Axial CLL x Abaxial CLL | -6106 to 18312 | 0.2671 | No |
| HL vs. ALL | -52475 to -16793 | 0.0005 | Yes |
| HL vs. CLL | -30657 to 971.4 | 0.0828 | No |
| ALL vs. CLL | 3977 to 35605 | 0.0079 | Yes |
| HL vs. CLL UP | -35655 to -9412 | 0.0114 | Yes |
| HL vs. CLL NO | -19524 to 9638 | 0.5609 | No |
| GPR55 | Axial HL x Abaxial HL | 2277 to 16550 | 0.0247 | Yes |
| Abaxial CLL vs. Axial CLL | -14313 to 15.56 | 0.0170 | Yes |
| Abaxial ALL vs. Axial ALL | -17170 to 1785 | 0.1326 | No |
| Abaxial HL vs. Abaxial ALL | -31700 to -12745 | <0.0001 | Yes |
| Abaxial HL vs. Abaxial CLL | -13808 to 2993 | 0.3624 | No |
| Axial HL vs. Axial ALL | -29979 to -11024 | <0.0001 | Yes |
| Axial HL vs. Axial CLL | -11544 to 5258 | 0.5665 | No |
| Axial ALL vs. Axial CLL | 8958 to 25760 | <0.0001 | Yes |
| Abaxial ALL vs. Abaxial CLL | 8414 to 25216 | <0.0001 | Yes |

Legend: HL: healthy laminae, control group; ALL: acute laminitic laminae; CLL: chronic laminitic laminae; CLL UP: chronic laminitic laminae subgroup with upregulation tendency; CLL DOWN: chronic laminitic laminae subgroup with downregulation tendency; CLL NO: chronic laminitic laminae subgroup with no significant difference. The Confidence Interval was 95%, with p < 0.05 considered significant, after normalisation of the data.
