# Supplementary material for: Distribution of endocannabinoid system receptors in the equine hoof: dysregulation as a potential therapeutic target for laminitis
Source: Springer Nature journal article supplement (doi:10.1007/s00418-025-02397-y), 2025-07-01
Supplement: MOESM4 [file 418_2025_2397_MOESM4_ESM.docx]

Distribution of endocannabinoid system receptors in the equine hoof: dysregulation as a potential therapeutic target for laminitis

Histochemistry and Cell Biology

Rodrigo Zamith Cunha1,2*, Francesca Gobbo1, Maria Morini1, Augusta Zannoni1, Carlo Mainardi1, Lorenzo D’arpe1, Alessandro Gramenzi2, Roberto Chiocchetti1

1 Department of Veterinary Medical Sciences (UNI EN ISO 9001:2008), University of Bologna, Italy

2 Department of Veterinary Medicine, University of Teramo, Teramo, Italy

* Corresponding author email: rodrigo.zamithcunha@studio.unibo.it


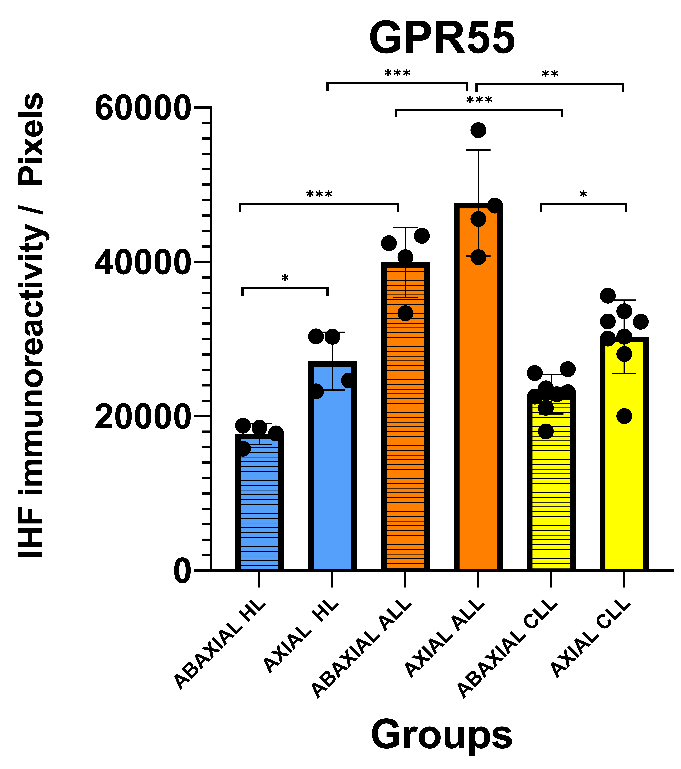


**Supplementary item 4**. The quantification of GPR55 immunofluorescence in the abaxial and the axial regions of healthy (HL) and laminitic (ALL, CLL) laminae. The bar graph illustrates the intensity of GPR55 immunoreactivity (measured in pixels) across the abaxial and the axial regions of healthy laminae (HL), acute laminitic laminae (ALL), and chronic laminitic laminae (CLL). Significant differences in GPR55 expression are observed between the abaxial and the axial regions of each group, with marked upregulation in the ALL group as compared to the HL group (**p < 0.01, 95% CI; ***p < 0.001, 95% CI), and between the ALL and CLL groups (*p < 0.05, 95% CI). The CLL group shows variable GPR55 expression, with a notable difference between its abaxial and axial regions (*p < 0.05, 95% CI). The data are represented as mean + SD, and statistical significance was determined using one-way ANOVA followed by a Tukey's post-hoc test.
